# Supplementary material for: Development of a cross-cultural deprivation index in five European countries
Source: HighWire-hosted journal article supplement (doi:10.1136/jech-2015-205729), 2015-12-11
Supplement: jech-2015-205729supp1.pdf [file jech-2015-205729supp1.pdf]

**Supplementary material 1:** For each country, the score of the EDI for a geographical unit is calculated using the following formula (2001 census data, except for France, 1999 ; EU-SILC survey 2006)

| France                                                                                                                                                                                                                                                                   | Italy                                                                                                                                                                                                                                      | Portugal                                                                                                                                                                                                               | Spain                                                                                                                                                                                                                                      | England                                                                                                                                                                                                                                                      |
|--------------------------------------------------------------------------------------------------------------------------------------------------------------------------------------------------------------------------------------------------------------------------|--------------------------------------------------------------------------------------------------------------------------------------------------------------------------------------------------------------------------------------------|------------------------------------------------------------------------------------------------------------------------------------------------------------------------------------------------------------------------|--------------------------------------------------------------------------------------------------------------------------------------------------------------------------------------------------------------------------------------------|--------------------------------------------------------------------------------------------------------------------------------------------------------------------------------------------------------------------------------------------------------------|
| =0.21*Overcrowding<br>+0.71*No bath or shower<br>+1.02*Non-owner<br>+0.71*No car<br>+1.00*Single-parent household<br>+0.97*Household with $\geq 6$ persons<br>+1.17*No higher education<br>+0.57*Low-income occupations<br>+0.94*Unemployed<br>+0.41*Foreign nationality | =0.83*Overcrowding<br>+2.08* No bath or shower<br>+0.56* No indoor flushing<br>+1.07*Non-owner<br>+0.15* No married<br>+0.33* Women aged $\geq 65$ yrs<br>+1.07* No higher education<br>+0.19* Low-income occupations<br>+1.18* Unemployed | =0.40*Overcrowding<br>+0.06* No bath or shower<br>+1.46* No indoor flushing<br>+1.19* Non-owner<br>+0.25* Women aged $\geq 65$ yrs<br>+1.29* No higher education<br>+0.01* Low-income occupations<br>+0.37* Unemployed | =0.49*Crime/vandalism<br>+0.99*Overcrowding<br>+1.33* No bath or shower<br>+0.73* Non-owner<br>+1.74* No car<br>+0.37* No married<br>+1.30* No higher education<br>+0.95* No self-employer with employees<br>+0.62* Low-income occupations | =0.95*Overcrowding<br>+0.85*No detached house<br>+1.46* Non-owner<br>+0.83* No car<br>+1.35* Single-parent household<br>+0.45* No married<br>+0.98* Permanently disabled or/and unfit to work<br>+0.31* No higher education<br>+0.39* Low-income occupations |
