# Supplementary material for: Development of a cross-cultural deprivation index in five European countries
Source: HighWire-hosted journal article supplement (doi:10.1136/jech-2015-205729), 2015-12-11
Supplement: jech-2015-205729supp2.pdf [file jech-2015-205729supp2.pdf]

Supplementary material 2 : Mapping of EDI

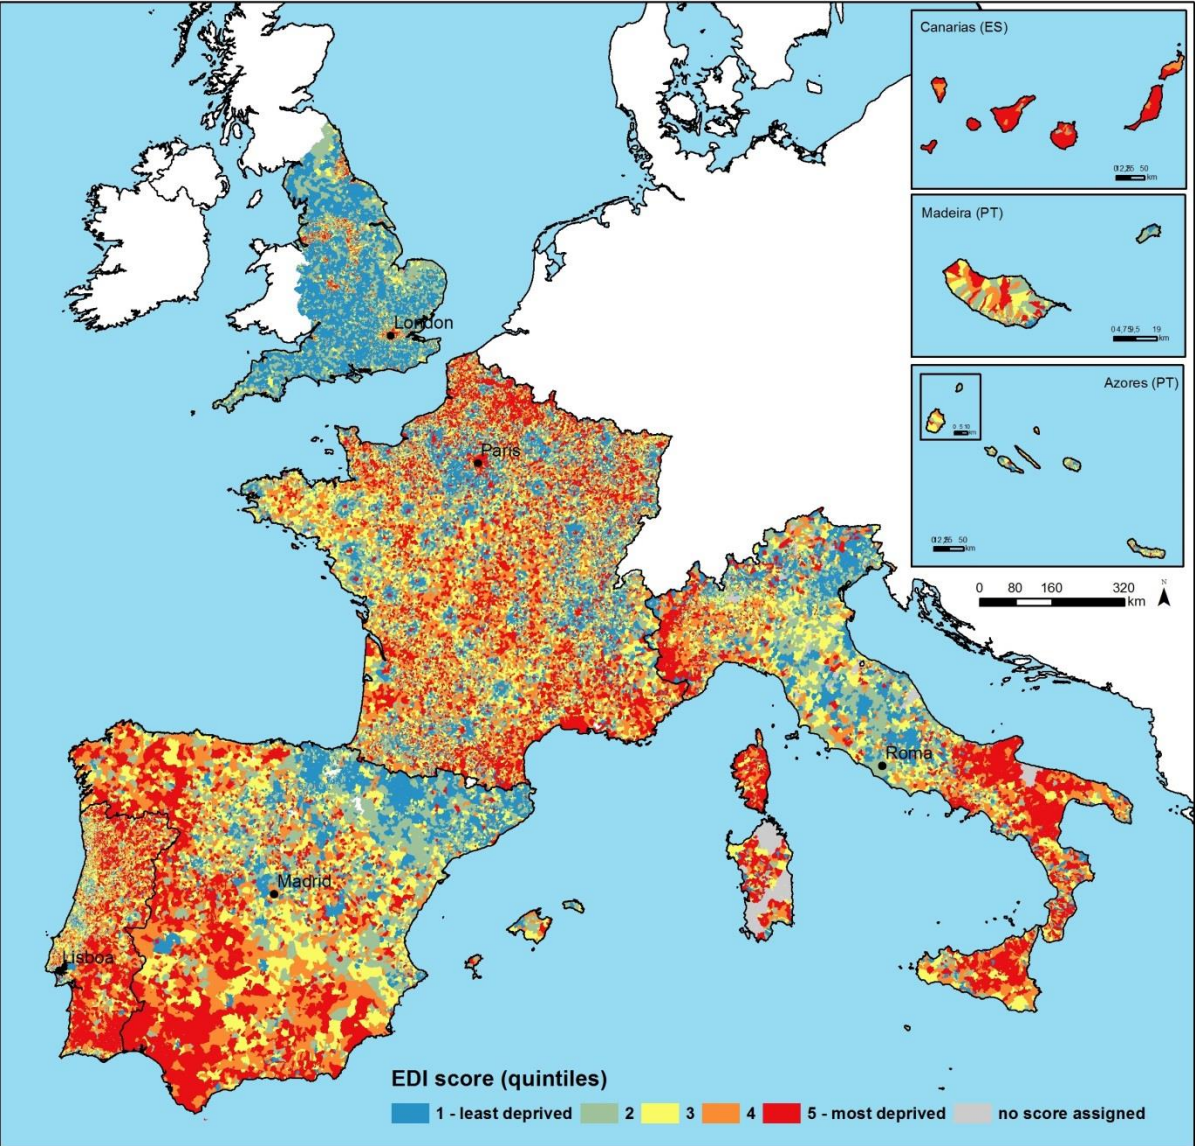

EDI scores show that France is most deprived in the north and around the Mediterranean Sea. General patterns are heterogeneous. In towns, the centre appears to have the most concentrated deprivation, with suburb areas least deprived. Spain appears divided roughly into two parts, of which the least deprived is the northeast quarter (especially Aragón, Cataluña, País Vasco, and Navarra). The most deprived regions of Spain are Andalucía, Galicia, and the Canary Islands. In Italy, the most deprived areas are concentrated mainly in the southern regions, especially in Sicilia and Calabria, while the least deprived are clearly concentrated in the Aosta Valley, Friuli Venezia Giulia, and Veneto regions. Portugal shows a clear geographic pattern, with the most deprived areas concentrated in the south, inner

north, and centre regions of the country, whereas the least deprived areas are predominantly located in the north, centre, and Algarve coastal areas. In England, the most deprived areas are mainly large concentrated urban centres (Birmingham, Cardiff, Leeds, Liverpool, London, Manchester, Newcastle, and Plymouth).
